# Supplementary material for: Design of an Improved Cooking Stove Using High Density Heated Rocks and Heat Retaining Techniques
Source: Hindawi journal article supplement (doi:10.1155/2018/9620103), 2018-10-28
Supplement: f1 [file 9620103.f1.pdf]

**CERTIFICATE OF ANALYSIS**

Date: 29-Mar-18

1. Project: Design of improved stove that uses high density rocks to maintain heat
2. Client: Mr Asimwe Antony Bantu & Nuwagaba Gilbert
3. Samples Description: 14/10 mm Hand Crushed Aggregates
4. Nature of test: Specific Gravity, Water Absorption
5. Test Method: AASHTO T84/85
6. Sample Ref. 2018/S118
7. Results: As Summarised below  
Summary of Laboratory Test Results

| Sample Test Identification       | Specific Gravity | Water Absorption (%) |
|----------------------------------|------------------|----------------------|
| 14/10 mm Hand Crushed Aggregates | 2.72             | 0.42                 |

**8. Remarks**

8.1 This report relates only to the samples tested.

8.2 All tested samples will be immediately discarded after receipt of results by the client

Checked by

  
 PP  
 Arthur Mutabazi  
 Materials Engineer  
 Teclab Ltd

Approved by:

  
**TECLAB LIMITED**  
 THE ENGINEERS LABORATORY  
 P. O. BOX 24934  
 Alex Ssenyondo Mulira  
 Technical Manager  
 Teclab Ltd

Figure S1: Certificate of analysis for specific gravity and water absorption tests carried out

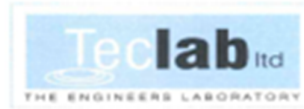

EXCELLENCE THROUGH PRECISION AND INTEGRITY

| Determination of Aggregate Relative Density             |                                                                        |                          |           |
|---------------------------------------------------------|------------------------------------------------------------------------|--------------------------|-----------|
| Project :                                               | Design of improved stove that uses high density rocks to maintain heat |                          |           |
| Project No:                                             | 2018/S112                                                              |                          |           |
| Client:                                                 | Mr Asimwe Antony Bantu & Nuwagaba Gilbert                              |                          |           |
| Location                                                | N/A                                                                    | Sampling date:           | 26-Mar-18 |
| Aggregate size :                                        | 14/10                                                                  | Testing date:            | 26-Mar-18 |
| Sample Reference                                        | S1                                                                     |                          |           |
| Description of aggregates:                              | 14/10 hand crushed single size aggregates                              |                          |           |
| Ref :                                                   | AASHTO T84/85                                                          |                          |           |
| Sample No.                                              | 1                                                                      | 2                        |           |
| Weight of oven dry sample in air , A                    | g 824.7                                                                | 811.4                    |           |
| Weight of saturated surface dry sample in air (SSD) , B | g 828.5                                                                | 814.4                    |           |
| Absorption ( % ) = ((B-A)/A)*100                        | 0.46                                                                   | 0.37                     |           |
| Technician(Signature):                                  | Checked by (Signature):                                                | Approved by (Signature): |           |
|                                                         |                                                                        |                          |           |
| TL-TI-FORM-25, March 2018                               |                                                                        |                          |           |

**TECLAB LIMITED**  
 THE ENGINEERS LABORATORY  
 P. O. BOX 24934, KAMPALA

PREVIOUS EDITION OBSOLETE

Figure S2: Water absorption results for granite rock aggregates

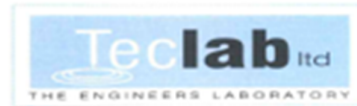

EXCELLENCE THROUGH PRECISION AND INTEGRITY

| SPECIFIC GRAVITY OF AGGREGATES                                                     |                                                                        |                       |                                |  |  |
|------------------------------------------------------------------------------------|------------------------------------------------------------------------|-----------------------|--------------------------------|--|--|
| <b>Project:</b>                                                                    | Design of improved stove that uses high density rocks to maintain heat |                       |                                |  |  |
| <b>Project No:</b>                                                                 | 2018/S112                                                              |                       |                                |  |  |
| <b>Client:</b>                                                                     | Mr Asiimwe Antony Bantu & Nuwagaba Gilbert                             |                       |                                |  |  |
| <b>Location/Source:</b>                                                            | N/A                                                                    |                       |                                |  |  |
| <b>Soil Description:</b>                                                           | 14/10 hand crushed single size aggregates                              |                       |                                |  |  |
| <b>Sample Reference:</b>                                                           | S1                                                                     | <b>Sampling Date:</b> | 26-Mar-18                      |  |  |
|                                                                                    |                                                                        | <b>Testing Date:</b>  | 28-Mar-18                      |  |  |
| Specimen Number                                                                    |                                                                        | 1                     |                                |  |  |
| Mass of Gas Jar and Plate (M1)                                                     | g                                                                      | 998                   |                                |  |  |
| Mass of Gas Jar, Plate and Aggregates (M2)                                         | g                                                                      | 1822.8                |                                |  |  |
| Mass of Gas Jar, Plate, Aggregates and Water (M3)                                  | g                                                                      | 2822                  |                                |  |  |
| Mass of Gas Jar, Plate and Water (M4)                                              | g                                                                      | 2300                  |                                |  |  |
| Specific Gravity of Aggregates,<br>$G_s = (M_2 - M_1) / (M_4 - M_1) - (M_3 - M_2)$ |                                                                        | 2.72                  |                                |  |  |
| Reported Specific Gravity, $G_s$                                                   |                                                                        | 2.72                  |                                |  |  |
| <b>Technician (Signature):</b>                                                     | <b>Computed by (Signature):</b>                                        |                       | <b>Checked by (Signature):</b> |  |  |
|                                                                                    |                                                                        |                       |                                |  |  |
| <div style="text-align: right;"> </div>                                            |                                                                        |                       |                                |  |  |

Figure S3: Specific gravity results for granite rock aggregates

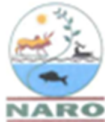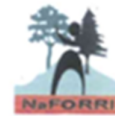

NATIONAL FORESTRY RESOURCES RESEARCH INSTITUTE

P O Box 1752, Kampala; Tel: 071 161161, 0752 161161 Fax: 0414 383028

E-mail: [naforridir@infocom.co.ug](mailto:naforridir@infocom.co.ug)

Date: 6<sup>th</sup> April, 2018

Name of client: Mr. Asiimwe Anthony Bantu and Mr. Nuwagaba Gilbert  
 Description of sample: Granite rock  
 Sample Number: NaFF/0002/UCU/3/4/2018  
 Origin: East African Granite, Nyagatare-Rwanda  
 Initial weight: 401.65g  
 Activity: Thermal test  
 Receipt Date: 2<sup>nd</sup> April 2018  
 Test Method: Oven heating

RESULTS

| Maximum temperature of granite in the stove: 150°C |                |          |                  |  |
|----------------------------------------------------|----------------|----------|------------------|--|
| Start Time: 1:50pm                                 |                |          |                  |  |
| S/n                                                | Time (minutes) | mass (g) | Temperature (°C) |  |
| 1                                                  | 0              | 401.65   | 24.8             |  |
| 2                                                  | 20             | 401.34   | 220              |  |
| 3                                                  | 40             | 401.24   | 293              |  |
| 4                                                  | 60             | 401.24   | 284              |  |
| 5                                                  | 80             | 401.22   | 289              |  |
| 6                                                  | 100            | 401.22   | 292              |  |
| 7                                                  | 120            | 401.21   | 294              |  |

Checked by:

*Aligibini*  
 Name: NIZIBIZI GEORGE Date: 6/4/18  
 Senior Technician

Approved by:

*[Signature]*  
 Name: Turinayo Yonah Date: 6<sup>th</sup>/4/2018  
 Research Scientist

DIRECTOR  
 NATIONAL FORESTRY RESOURCES  
 RESEARCH INSTITUTE

Figure S4: Thermal test results

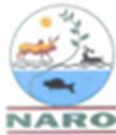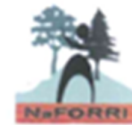

# NATIONAL FORESTRY RESOURCES RESEARCH INSTITUTE

P O Box 1752, Kampala; Tel: 071 161161, 0752 161161 Fax: 0414 383028

E-mail: [naforridir@infocom.co.ug](mailto:naforridir@infocom.co.ug)

Date: 6<sup>th</sup> April, 2018

**Name of client:** Mr. Asiimwe Anthony Bantu and Mr. Nuwagaba Gilbert  
**Description of sample:** Charcoal stove prototype  
**Sample Number:** NaFF/0001/UCU/3/4/2018  
**Activity:** Water boiling test (WBT)  
**Receipt Date:** 2<sup>nd</sup> April 2018  
**Test Method:** Volunteer in Technical Assistance (VITA) protocol

## RESULTS

| SUMMARY RESULTS                                 |                                       |                      |               |         |         |         |         |       |
|-------------------------------------------------|---------------------------------------|----------------------|---------------|---------|---------|---------|---------|-------|
| S/n                                             | Performance measure                   | Unit of measure      | Tests (n = 4) |         |         |         | MEAN    | STDEV |
|                                                 |                                       |                      | 1             | 2       | 3       | 4       |         |       |
| 1                                               | Thermal efficiency                    | %                    | 24.8          | 29.4    | 35.7    | 25.2    | 28.8    | 5.1   |
| 2                                               | Water boiling rate                    | min/ltr              | 14.9          | 15.5    | 14.1    | 14.8    | 14.8    | 0.6   |
| 3                                               | Specific fuel consumption             | g/liter water boiled | 53.1          | 45.0    | 36.0    | 53.7    | 47.0    | 8.3   |
| 4                                               | Fire power                            | W                    | 1773.8        | 1443.8  | 1273.5  | 1800.4  | 1572.9  | 257.2 |
| 5                                               | Fuel Use Reduction                    | %                    | 76.1          | 79.7    | 83.8    | 75.8    | 78.8    | 3.7   |
| PRIMARY DATA                                    |                                       |                      |               |         |         |         |         |       |
| S/n                                             | Parameters                            | Unit of measure      | Tests (n = 4) |         |         |         | MEAN    | STDEV |
|                                                 |                                       |                      | 1             | 2       | 3       | 4       |         |       |
| 1                                               | Thermal efficiency                    | %                    | 24.8          | 29.4    | 35.7    | 25.2    | 28.8    | 5.1   |
| 2                                               | Mass of water boiled                  | g                    | 2925          | 2875    | 2850    | 2800    | 2862.5  | 52.0  |
| 3                                               | Specific heat capacity of water       | J/g°C                | 4.186         | 4.186   | 4.186   | 4.186   | 4.186   | 0     |
| 4                                               | Water boiling temperature             | °C                   | 96.8          | 96.8    | 96.8    | 96.8    | 96.8    | 0     |
| 5                                               | Initial water temperature before test | °C                   | 24.7          | 24.5    | 21.8    | 23.2    | 23.55   | 1.34  |
| 6                                               | Water vaporised                       | g                    | 100           | 100     | 75      | 100     | 93.75   | 12.5  |
| 7                                               | Latent heat of veporisation           | J/g                  | 2260          | 2260    | 2260    | 2260    | 2260    | 0     |
| 8                                               | Fuel consumed                         | g                    | 150           | 125     | 100     | 145     | 130     | 23    |
| 9                                               | Lower Heating Value of char (LHV)     | J/g                  | 29800         | 29800   | 29800   | 29800   | 29800   | 0     |
| 10                                              | Effective mass of water boiled        | g                    | 2825.00       | 2775.00 | 2775.00 | 2700.00 | 2768.75 | 51.54 |
| 11                                              | Time to boiling water                 | min                  | 42.00         | 43.00   | 39.00   | 40.00   | 41.00   | 1.83  |
| 12                                              | Water boiling rate                    | min/ltr              | 14.87         | 15.50   | 14.05   | 14.81   | 14.81   | 0.59  |
| 13                                              | Fuel consumed                         | g                    | 150.00        | 125.00  | 100.00  | 145.00  | 130.00  | 22.73 |
| 14                                              | Specific fuel consumption             | g/liter water boiled | 53.10         | 45.05   | 36.04   | 53.70   | 46.97   | 8.29  |
| 15                                              | Fire power                            | W                    | 0.00          | 0.00    | 0.00    | 0.00    | 0.00    | 0.00  |
| Specific fuel consumption - 3-stone stove (Kris |                                       |                      |               |         |         |         |         |       |
| 16                                              | De Decker, 2015)                      | g/liter water boiled | 222           | 222     | 222     | 222     | 222     | 0     |
| 17                                              | Fuel Use Reduction                    | %                    | 76.08         | 79.71   | 83.77   | 75.81   | 78.84   | 3.73  |

Checked by:

*George*  
 Name: *NIXOLIS GEORGE* Date: *6/4/18*  
 Senior Technician

Approved by:

*Turimayo*  
 Name: *Turimayo Yonah K* Date: *6/4/2018*  
 Research Scientist

**DIRECTOR**  
 NATIONAL FORESTRY RESOURCES  
 RESEARCH INSTITUTE

Figure S5: Water boiling test results
